# Supplementary material for: Computational Sedimentation Modelling Calibration: a tool to measure the settling velocity at different gravity conditions
Source: Copernicus journal article supplement (doi:10.5194/esurf-2023-11), 2023-10-19
Supplement: Supplementary file 1 [file esurf-2023-11-supplement.pdf]

**Supplementary Information for**  
**Computational Sedimentation Modelling Calibration: a tool to measure the**  
**settling velocity at different gravity conditions**

**By N. J. Kuhn and F. Trudu**

**Description of Supplementary Tables and Figures.**

**Supplementary Table 1 shows the calculations performed to ensure that the image analysis procedure used to calculate the terminal velocity was correct. Supplementary Tables 2,3, and 4 summarize the data used to calculate the terminal velocity for hyper, Martian, and lunar gravity, respectively, using the least squares method. Supplementary Figures 1-16 show the vertical position of each sample in function of time, the Least Squares function and the R2 value for each set of data. Finally, terminal velocity, Reynolds number and drag coefficient as computed from the set of data obtained by applying the least square method to the range of data extracted by video analysis.**

**Supplementary Table 1: Comparison between the terminal velocity calculated by eye counting frames, the number of frames (NOF) and the corresponding equation calculated by the least squares method. The distance traveled by a particle in the central part of the sedimentation chamber,  $\Delta z = Z_f - Z_i$ , is divided by the time, calculated as  $\text{nof}$  divided by the camera frequency (120 fps),  $\Delta t = \text{NOF}/120$ . This yields the velocity  $w = \Delta z/\Delta t$ . As can be seen, there are no great fluctuations in the number of frames, and the absolute error between the terminal velocity values calculated by counting the number of frames and the least squares method is composed between 0.66 and 0.2  $\text{cm}\cdot\text{s}^{-1}$  for Chamber 1 (CH1), 1.05 and 0.04  $\text{cm}\cdot\text{s}^{-1}$  for Chamber 2 (CH2), and 0.39 and 0.08  $\text{cm}\cdot\text{s}^{-1}$  for Chamber 4 (CH4). The comparison shows that the automated procedure provides reliable results and can be used to calculate terminal velocities at different gravities.**

| <b>CH1</b> | <b>Z<sub>i</sub> (cm)</b> | <b>Z<sub>f</sub> (cm)</b> | <b>Δz (cm)</b> | <b>NOF</b> | <b>w (cm·s<sup>-1</sup>)</b> | <b>Equation from linear regression</b> |
|------------|---------------------------|---------------------------|----------------|------------|------------------------------|----------------------------------------|
| 1/10       | 10.9696                   | 13.16763                  | 2.19803        | 8          | 32.970                       | $z(t) = 33.279t - 3.7672$              |
| 2/10       | 10.80526                  | 12.90058                  | 2.09532        | 8          | 31.429                       | $z(t) = 30.937t - 4.9022$              |
| 3/10       | 10.86689                  | 12.94166                  | 2.07477        | 8          | 31.126                       | $z(t) = 31.142t - 6.5341$              |
| 4/10       | 10.80526                  | 12.81841                  | 2.01315        | 7          | 34.511                       | $z(t) = 34.247t - 8.8405$              |
| 5/10       | 10.88743                  | 13.00329                  | 2.11586        | 7          | 36.272                       | $z(t) = 36.477t - 11.337$              |
| 6/10       | 10.84634                  | 13.06491                  | 2.21857        | 8          | 33.278                       | $z(t) = 33.566t - 9.8829$              |
| 7/10       | 10.88743                  | 13.02383                  | 2.1364         | 7          | 36.624                       | $z(t) = 36.771t - 12.178$              |
| 8/10       | 11.01068                  | 13.16763                  | 2.15694        | 8          | 32.354                       | $z(t) = 32.95t - 9.0754$               |
| 9/10       | 10.9696                   | 13.106                    | 2.1364         | 8          | 32.046                       | $z(t) = 31.389t - 9.6293$              |
| 10/10      | 10.80526                  | 12.92112                  | 2.11586        | 9          | 28.211                       | $z(t) = 28.819x - 9.594$               |
| <b>CH2</b> | <b>Z<sub>i</sub> (cm)</b> | <b>Z<sub>f</sub> (cm)</b> | <b>Δz (cm)</b> | <b>NOF</b> | <b>w (cm·s<sup>-1</sup>)</b> | <b>Equation from linear regression</b> |
| 1/10       | 10.90116                  | 13.12292                  | 2.22176        | 9          | 29.623                       | $z(t) = 29.795t - 3.2411$              |
| 2/10       | 10.8804                   | 12.97757                  | 2.09718        | 8          | 31.456                       | $z(t) = 32.184t - 4.909$               |
| 3/10       | 10.81811                  | 12.99834                  | 2.18023        | 8          | 32.703                       | $z(t) = 32.517t - 6.5375$              |
| 4/10       | 10.81811                  | 12.91528                  | 2.09718        | 9          | 27.962                       | $z(t) = 27.922t - 4.0555$              |
| 5/10       | 10.8804                   | 12.97757                  | 2.09718        | 8          | 31.456                       | $z(t) = 30.399t - 6.8503$              |
| <b>CH4</b> | <b>Z<sub>i</sub> (cm)</b> | <b>Z<sub>f</sub> (cm)</b> | <b>Δz (cm)</b> | <b>NOF</b> | <b>w (cm s<sup>-1</sup>)</b> | <b>Equation from linear regression</b> |
| 1/10       | 10.93109                  | 13.04348                  | 2.112387       | 8          | 31.685                       | $z(t) = 31.296t - 2.0834$              |
| 2/10       | 11.05177                  | 13.14708                  | 2.09532        | 8          | 31.429                       | $z(t) = 31.306t - 1.739$               |
| 3/10       | 10.88743                  | 13.08546                  | 2.19803        | 9          | 29.307                       | $z(t) = 28.909t - 4.2706$              |

|      |          |          |         |   |        |                           |
|------|----------|----------|---------|---|--------|---------------------------|
| 4/10 | 10.92851 | 13.02383 | 2.09532 | 8 | 31.429 | $z(t) = 31.512t - 4.8211$ |
| 5/10 | 10.88743 | 12.90058 | 2.01315 | 8 | 30.197 | $z(t) = 30.033t - 6.3897$ |

**Supplementary Table 2: Summary data of the samples in hypergravity. Column 2 and 3 show the range of time and distance, respectively, from which the terminal velocity is calculated by the least squares method. For completeness, the last column shows the range of gravity values recorded by the gravity logger, with a frequency of 1/10 Hz. For each sample, a figure of the position of a particle is shown as a function of time below. Each figure also shows the function obtained by applying the least squares method to the data set and the value of R2. As can be seen, the value of R2 is very close to 1, indicating that the linear regression fit very well with the measured data, and that the particles has actuatty reached a constant terminal velocity.**

| Hyper gravity | Range of time (s) | Range of distance (cm) | Range of gravity ( $m s^{-2}$ ) |
|---------------|-------------------|------------------------|---------------------------------|
| Sample 1      | 0.1 – 0.7083      | 0.206 – 24.733         | 15.865 – 16.765                 |
| Sample 1/5    | 0.083 – 0.675     | 0.186 – 24.628         | 16.814 – 17.471                 |
| Sample 2/5    | 0.233 – 0.783     | 0.165 – 24.793         | 16.814 – 17.716                 |
| Sample 3/5    | 0.241 – 0.775     | 0.165 – 24.627         | 16.814 – 17.716                 |
| Sample 4/5    | 0.250-0.775       | 0.0413– 24.627         | 18.586 – 19.593                 |
| Sample 5/5    | 0.4 – 0.958       | 0.124 – 24.793         | 17.110 – 17.691                 |

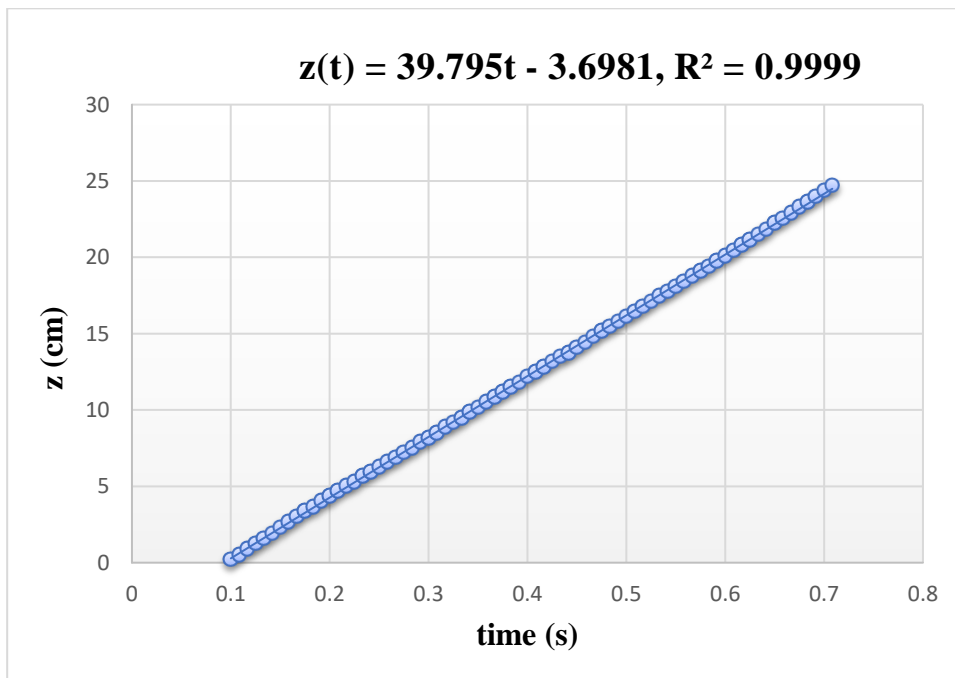

**Supplementary Figure 1: Sample Hyper 1**

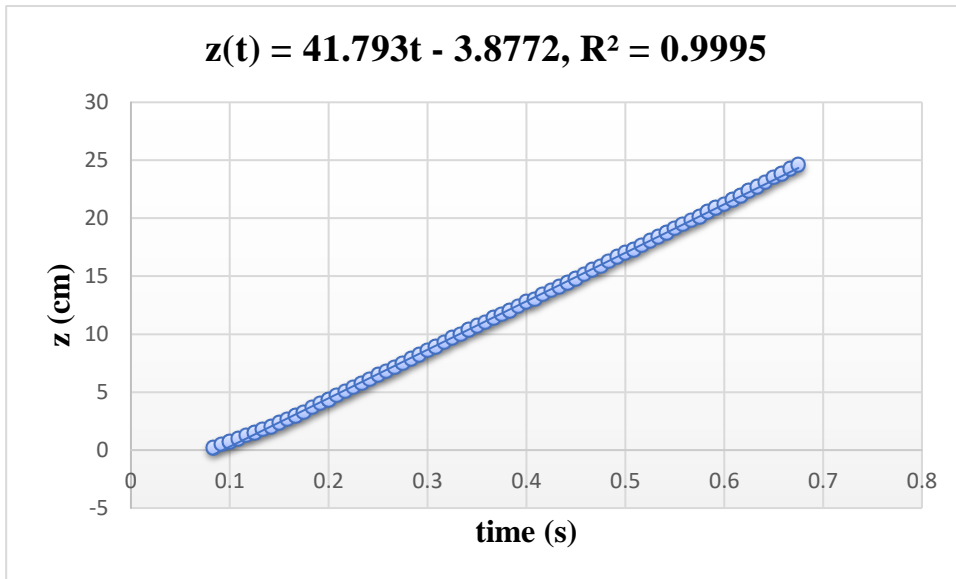

**Supplementary Figure 2: Sample Hyper 1/5**

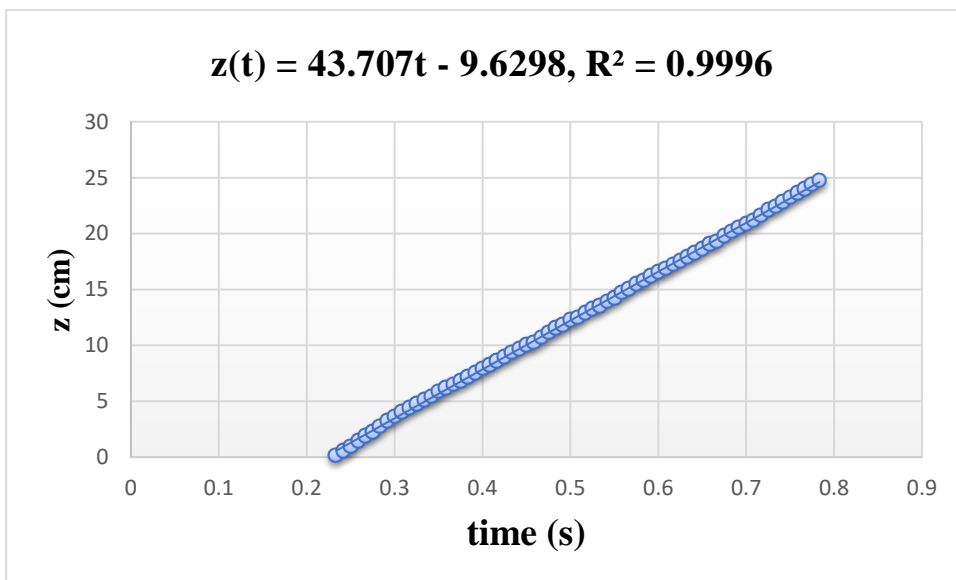

**Supplementary Figure 3: Sample Hyper 2/5**

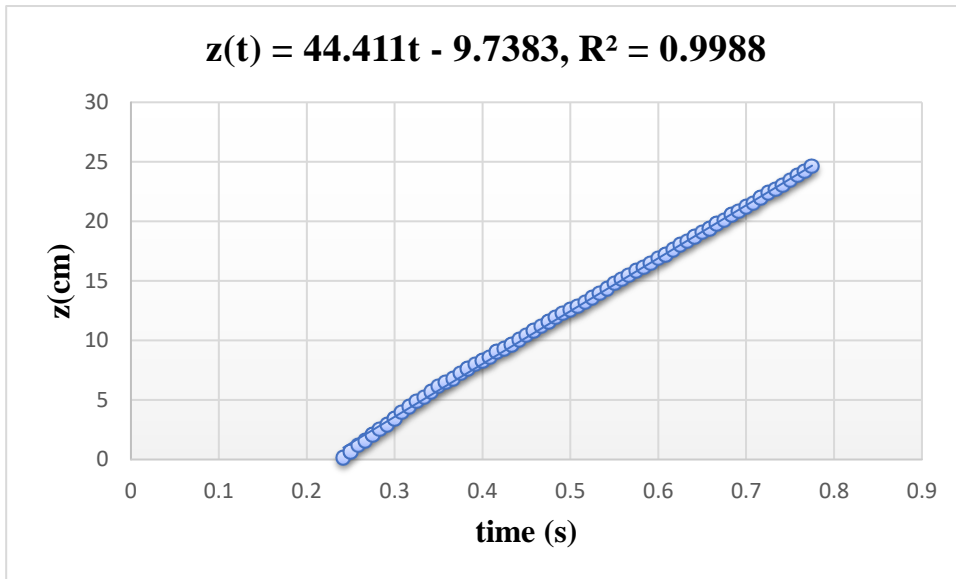

**Supplementary Figure 4: Sample Hyper 3/5**

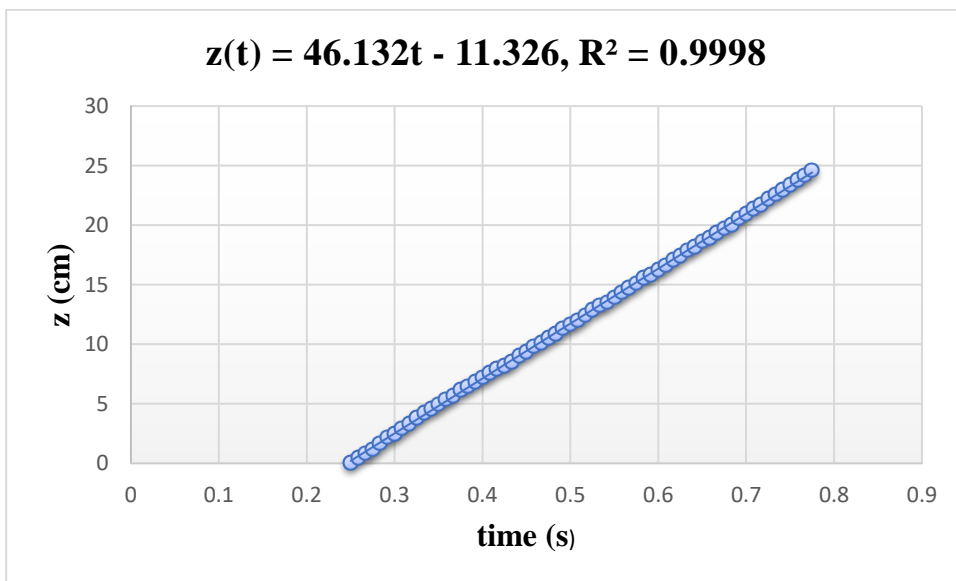

**Supplementary Figure 5: Sample Hyper 4/5**

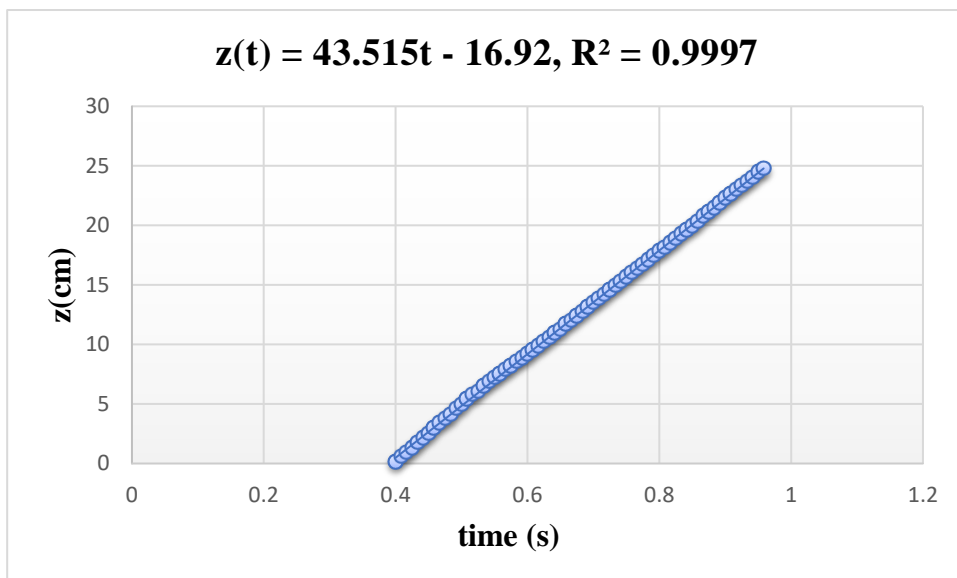

**Supplementary Figure 6: Sample Hyper 5/5**

**Supplementary Table 3: Summary data of the samples in Martian gravity (see Supplementary Table 2).**

| <b>Martian gravity</b> | <b>Range of time (s)</b> | <b>Range of distance (cm)</b> | <b>Range of gravity (<math>m\ s^{-2}</math>)</b> |
|------------------------|--------------------------|-------------------------------|--------------------------------------------------|
| Sample 1               | 0.241 - 1.666            | 0.102 - 24.917                | 3.476 - 4.411                                    |
| Sample 1/5             | 0.216 - 1.575            | 0.103 - 24.814                | 4.085 - 3.780                                    |
| Sample 2/5             | 0.241 - 1.683            | 0.041 - 24.813                | 4.085 - 3.780                                    |
| Sample 3/5             | 0.258 - 1.566            | 0.206 - 24.834                | 4.085 - 3.780                                    |
| Sample 4/5             | 0.258 - 1.616            | 0.124 - 24.896                | 0.416 - 0.385                                    |
| Sample 5/5             | 0.216 - 1.55             | 0.041 - 24.855                | 3.792 - 4.378                                    |

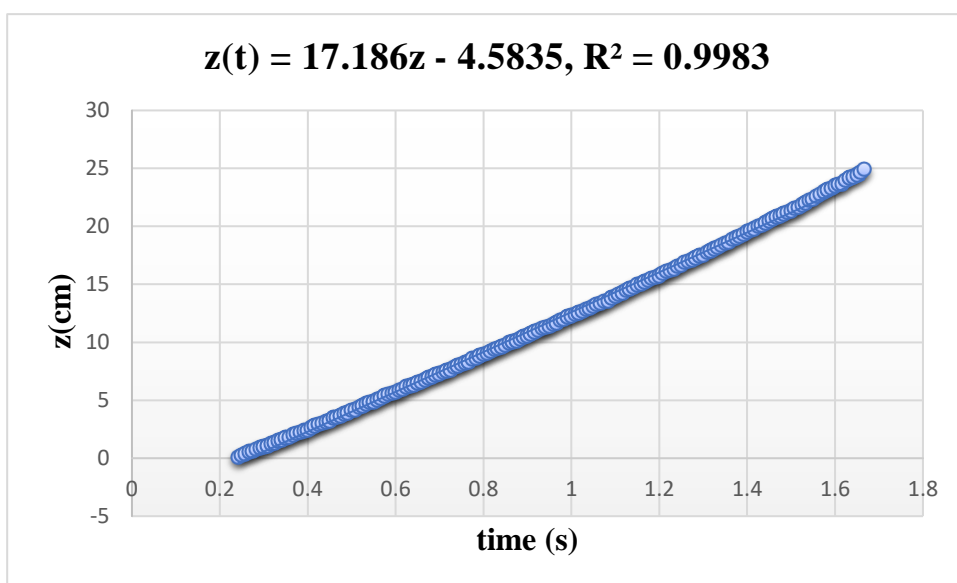

**Supplementary Figure 7: Sample Mars 1**

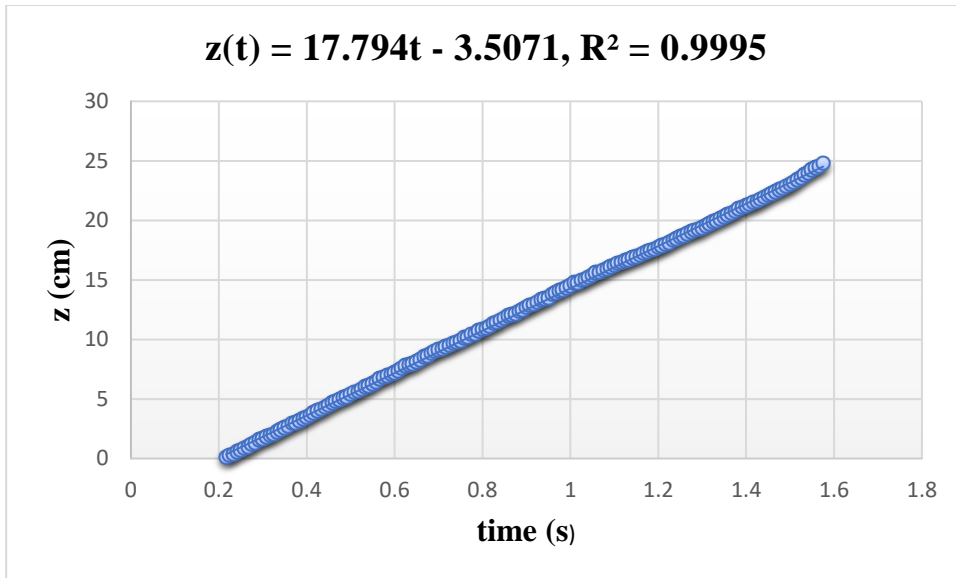

**Supplementary Figure 8: Sample Mars 1/5**

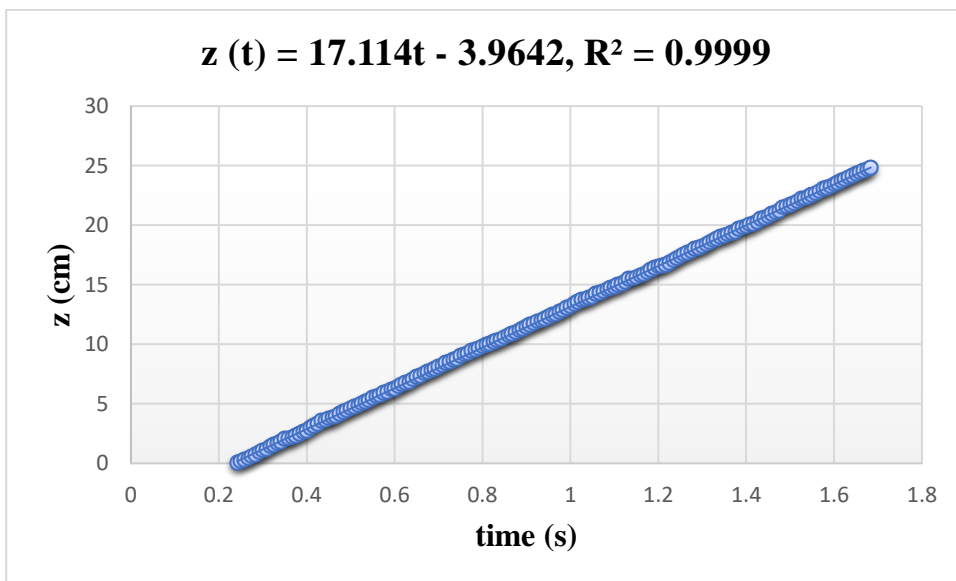

**Supplementary Figure 9: Sample Mars 2/5**

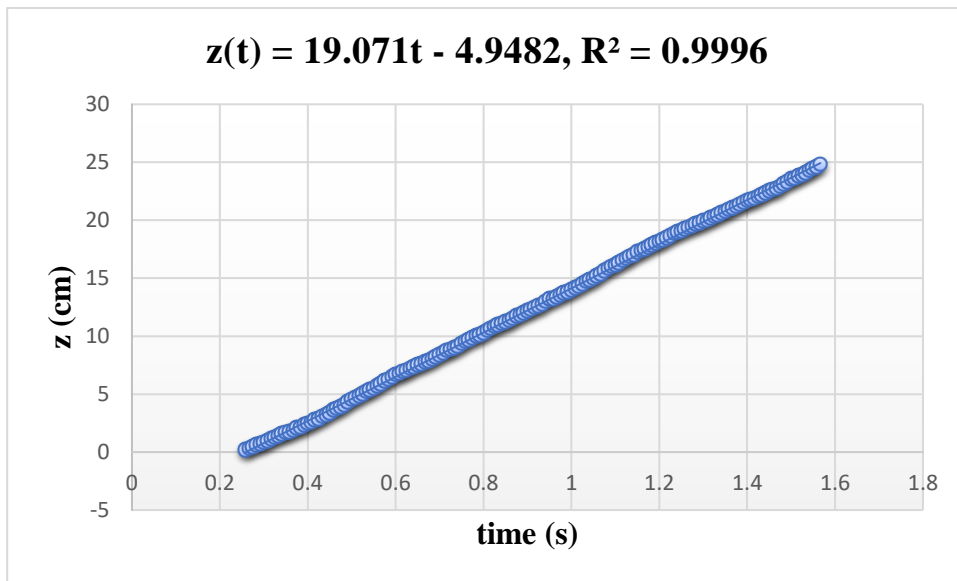

**Supplementary Figure 10: Sample Mars 3/5**

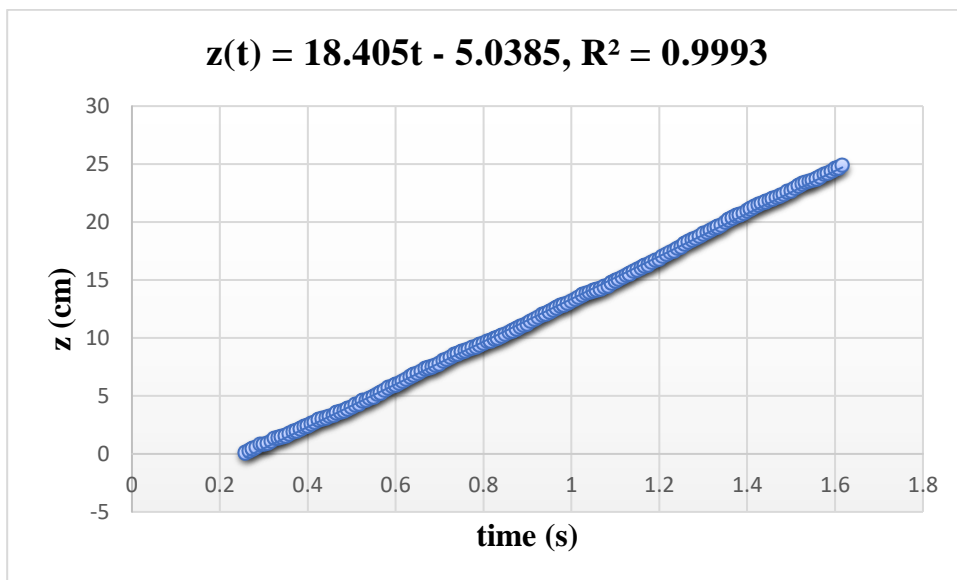

**Supplementary Figure 11: Sample Mars 4/5**



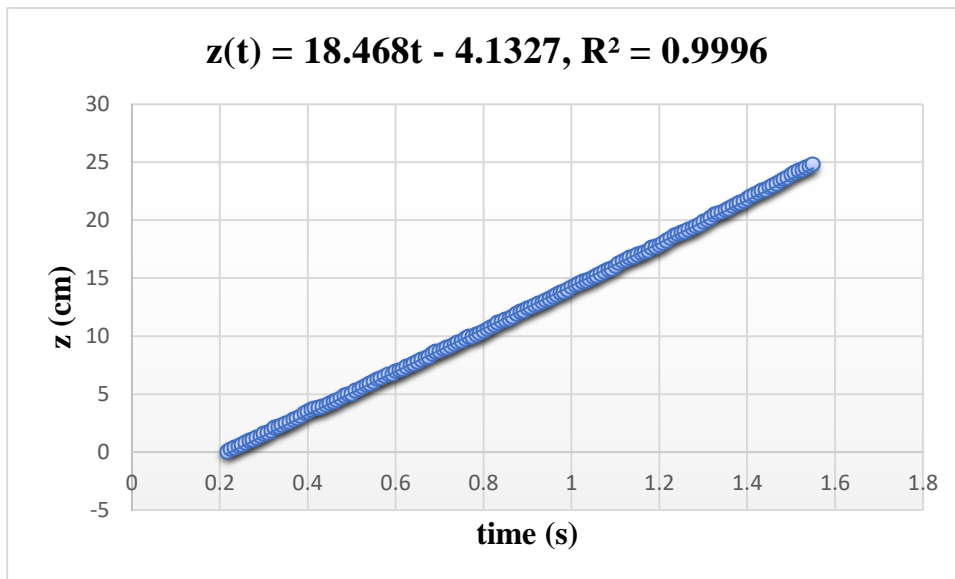

**Supplementary Figure 12: Sample Mars 5/5**

**Supplementary Table 4: Summary data of the samples in Martian gravity (see Supplementary Table 2 and 3)**

| <b>Lunar gravity</b> | <b>Range of time (s)</b> | <b>Range of distance (cm)</b> | <b>Range of gravity (<math>m s^{-2}</math>)</b> |
|----------------------|--------------------------|-------------------------------|-------------------------------------------------|
| Sample 1             | 0.4 - 2.758              | 0.165 - 24.813                | 2.040 - 2.017                                   |
| Sample 1/3           | 0.308 - 2.775            | 0.164 - 24.897                | 1.159 - 1.992                                   |
| Sample 2/3           | 0.308 - 2.825            | 0.041 - 24.979                | 0.118 - 0.2                                     |
| Sample 3/3           | 0.366 - 2.716            | 0.082 - 24.917                | 2.063 - 1.991                                   |

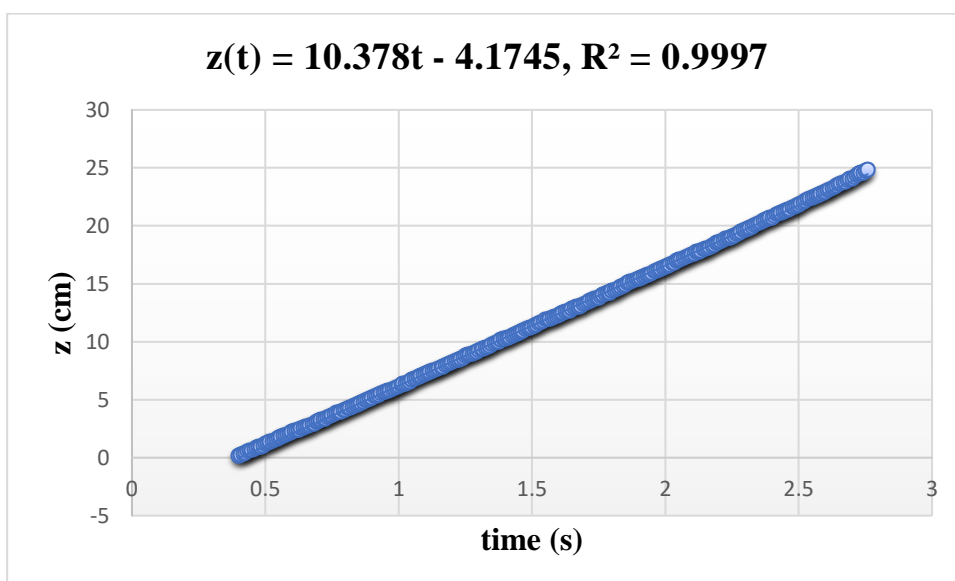

**Supplementary Figure 13: Sample Moon 1**

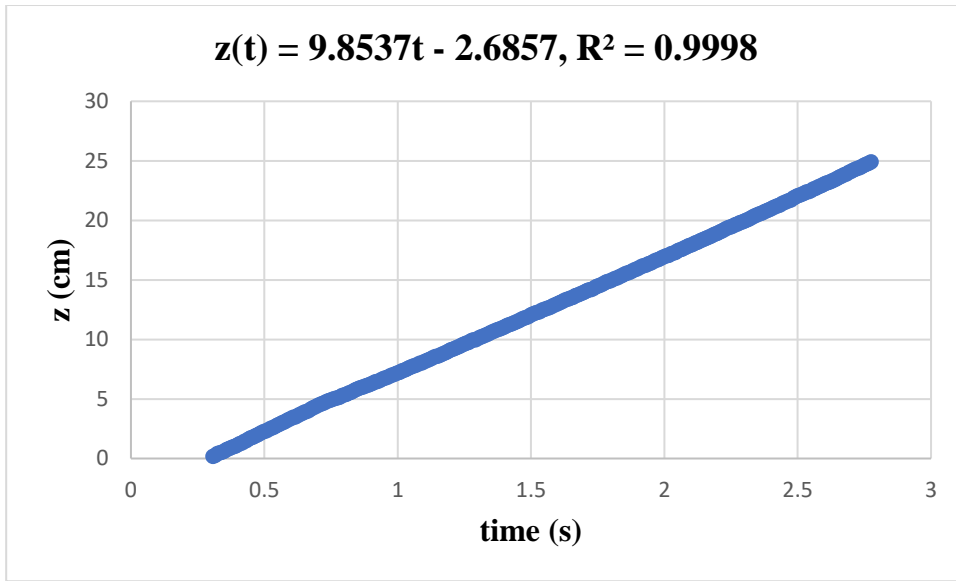

**Supplementary Figure 14: Sample Moon 1/3**

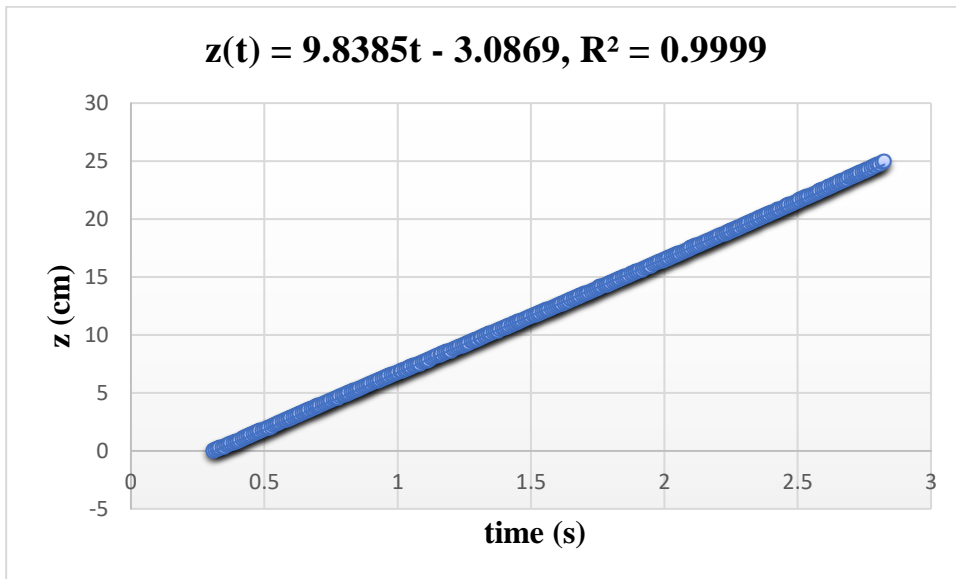

**Supplementary Figure 15: Sample Moon 2/3**

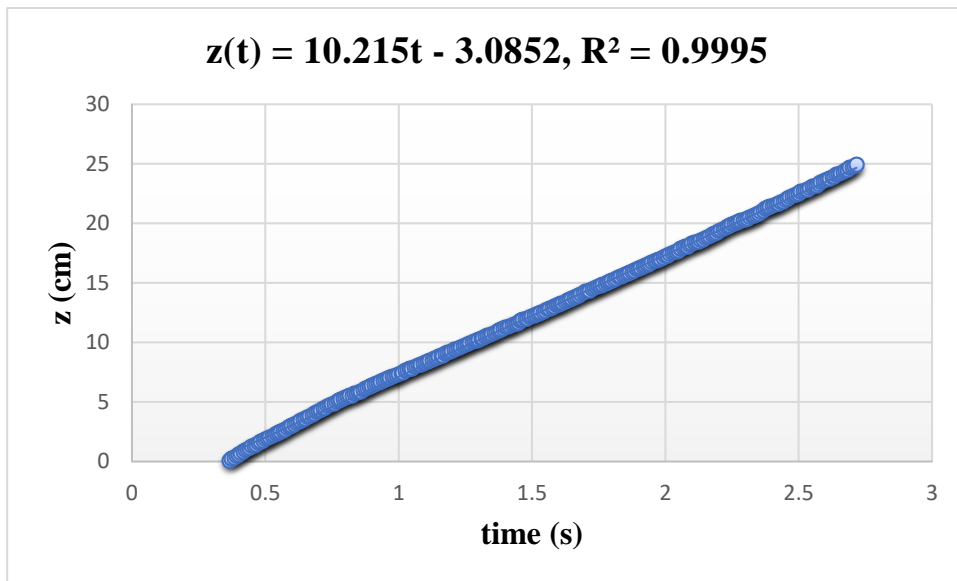

**Supplementary Figure 16: Sample Moon 3/3**

**Supplementary Table 5: Terminal velocity, Reynolds number and Drag coefficient for each sample and each acceleration gravity. The terminal velocity are calculated using the Least Squares method applied to the set of data reported in Supplementary Tables 2-4. The value of gravity is extracted by the gravity logger.**

| <b>Sample (Hyper)</b>    | <b>Gravity (m s<sup>-2</sup>)</b> | <b>w (cm s<sup>-1</sup>)</b> | <b>Re</b> | <b>Ca</b> |
|--------------------------|-----------------------------------|------------------------------|-----------|-----------|
| Sample 1                 | 16.2                              | 39.8                         | 764.3     | 0.38      |
| Sample 1/5               | 17.0                              | 41.8                         | 802.7     | 0.36      |
| Sample 2/5               | 17.2                              | 43.7                         | 839.2     | 0.33      |
| Sample 3/5               | 17.2                              | 44.4                         | 852.6     | 0.32      |
| Sample 4/5               | 17.2                              | 46.1                         | 885.3     | 0.30      |
| Sample 5/5               | 17.5                              | 43.5                         | 835.3     | 0.34      |
| Mean samples 1-5/5       | 17.2                              | 43.9                         | 843       | 0.34      |
| Standard deviation 1-5/5 | 0.16                              | 1.6                          | 29.9      | 0.02      |
| <b>Sample (Mars)</b>     | <b>Gravity (m s<sup>-2</sup>)</b> | <b>w (cm s<sup>-1</sup>)</b> | <b>Re</b> | <b>Ca</b> |
| Sample 1                 | 3.80                              | 17.2                         | 330.3     | 0.48      |
| Sample 1/5               | 3.95                              | 17.8                         | 341.8     | 0.46      |
| Sample 2/5               | 3.93                              | 17.1                         | 328.4     | 0.50      |
| Sample 3/5               | 3.94                              | 19.1                         | 366.8     | 0.40      |
| Sample 4/5               | 3.94                              | 18.4                         | 353.3     | 0.43      |
| Sample 5/5               | 4.02                              | 18.5                         | 355.3     | 0.44      |
| Mean samples 1-5/5       | 3.96                              | 18.2                         | 349.1     | 0.45      |
| Standard deviation 1-5/5 | 0.04                              | 0.8                          | 14.6      | 0.04      |
| <b>Sample (Moon)</b>     | <b>Gravity (m s<sup>-2</sup>)</b> | <b>w (cm s<sup>-1</sup>)</b> | <b>Re</b> | <b>Ca</b> |
| Sample 1                 | 1.91                              | 10.4                         | 199.7     | 0.66      |
| Sample 1/3               | 1.91                              | 9.9                          | 190.1     | 0.73      |
| Sample 2/3               | 1.91                              | 9.8                          | 188.2     | 0.73      |
| Sample 3/3               | 1.91                              | 10.2                         | 195.7     | 0.68      |

|                          |      |      |       |      |
|--------------------------|------|------|-------|------|
| Mean samples 1-3/3       | 1.91 | 9.97 | 191.3 | 0.71 |
| Standard deviation 1-3/3 | 0    | 0.21 | 3.9   | 0.03 |
